# Supplementary material for: Interfacial interactions and structures of protic ionic liquids on a graphite surface: A first-principles study and comparison with aprotic ionic liquids
Source: Royal Society of Chemistry journal article supplement (doi:10.1039/d1cp02100a), 2021-01-01
Supplement: d1cp02100a1.pdf [file d1cp02100a1.pdf]

## Electronic supplementary information (ESI)

### **Interfacial interactions and structures of protic ionic liquids on graphite surface: a first-principles study and comparison with aprotic ionic liquids**

Yunxiang Lu,<sup>\*a</sup> Yanmin Xu,<sup>a</sup> Ling Lu,<sup>a</sup> Zhijian Xu,<sup>b</sup> and Honglai Liu<sup>a</sup>

<sup>a</sup> *Key Laboratory for Advanced Materials, School of Chemistry & Molecular Engineering, East China University of Science and Technology, Shanghai, 200237, China*

<sup>b</sup> *Drug Discovery and Design Center, Shanghai Institute of Materia Medica, Chinese Academy of Sciences, Shanghai, 201203, China*

\* E-mail: [yxlu@ecust.edu.cn](mailto:yxlu@ecust.edu.cn)

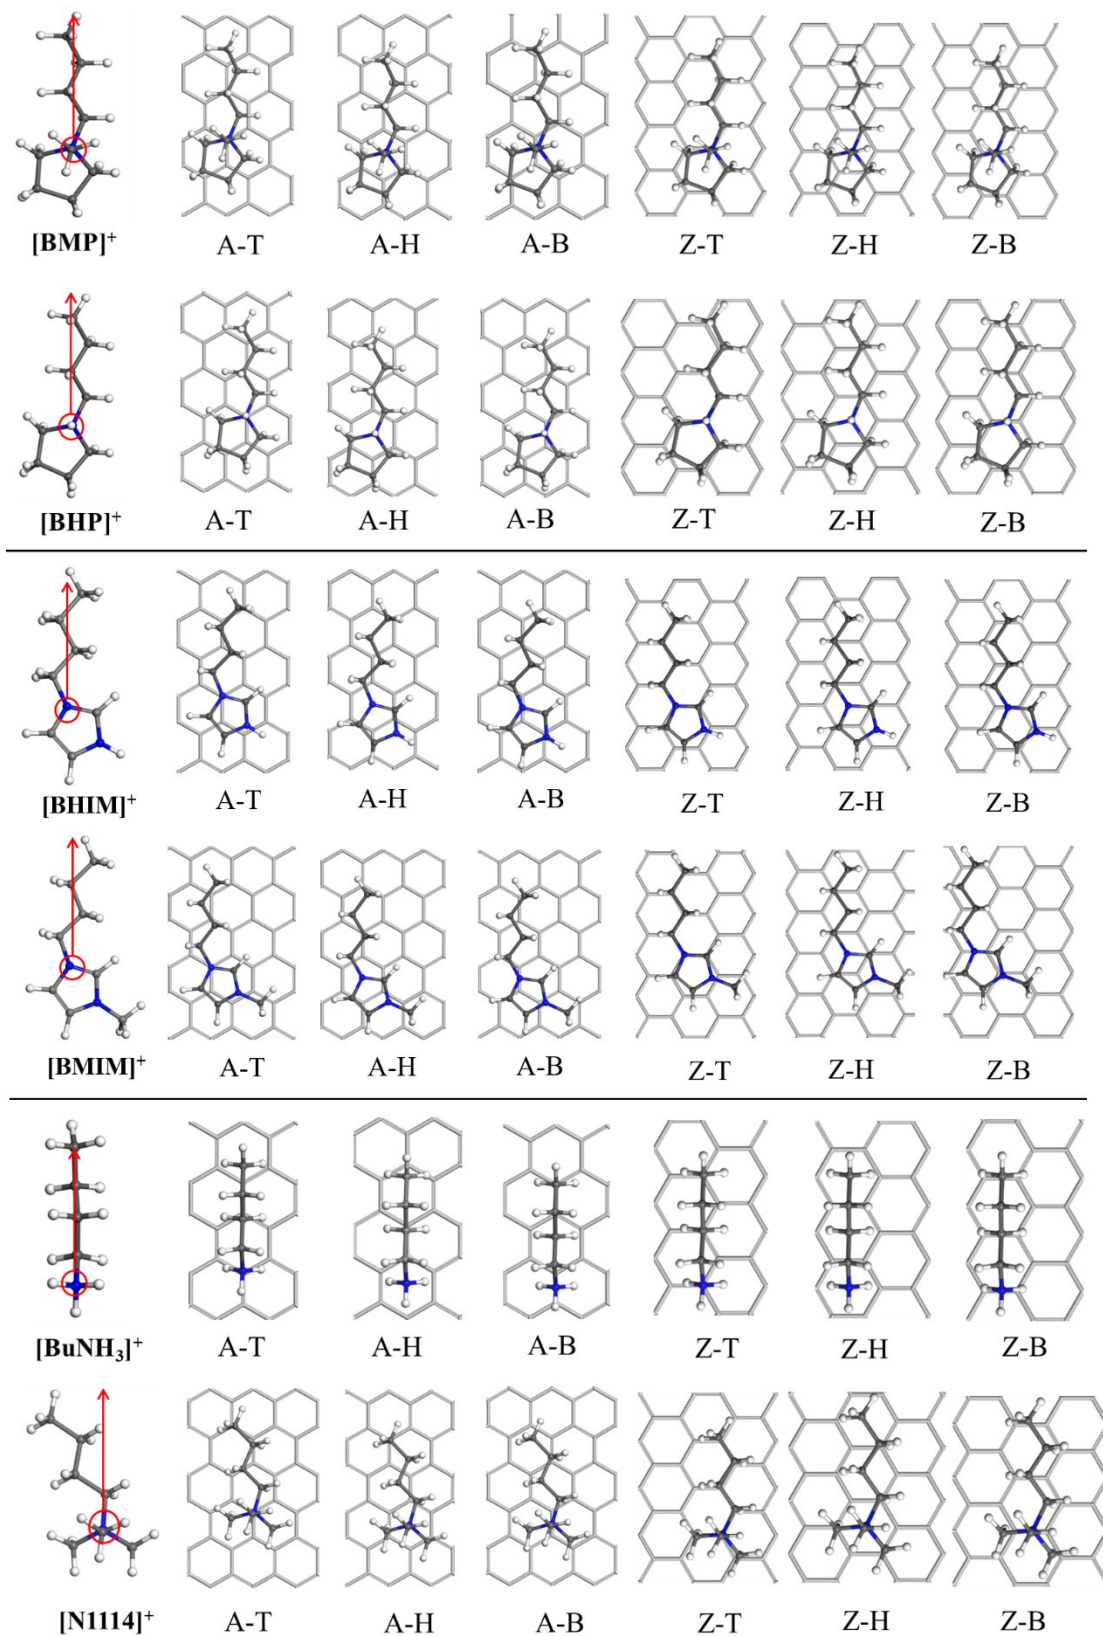

**Fig. S1** Optimized structures for the isolated cations adsorbed at three different sites (T, H, B) on graphite with the butyl chain along armchair (A) and zigzag (Z) axes.

**Table S1** The adsorption energies (kcal/mol) of the six configurations for the isolated cations<sup>a</sup>

| $E_{\text{ads}}$                  | Armchair axis |         |         | Zigzag axis |         |         |
|-----------------------------------|---------------|---------|---------|-------------|---------|---------|
|                                   | Top           | Hollow  | Bridge  | Top         | Hollow  | Bridge  |
| [BHP] <sup>+</sup>                | -103.66       | -102.86 | -103.40 | -102.98     | -102.87 | -103.45 |
| [BMP] <sup>+</sup>                | -103.24       | -102.79 | -103.34 | -102.58     | -102.78 | -103.19 |
| [BHIM] <sup>+</sup>               | -103.65       | -104.36 | -103.86 | -103.27     | -104.49 | -103.56 |
| [BMIM] <sup>+</sup>               | -104.77       | -104.82 | -104.98 | -104.35     | -104.95 | -104.08 |
| [BuNH <sub>3</sub> ] <sup>+</sup> | -104.12       | -105.01 | -103.63 | -104.07     | -105.40 | -103.61 |
| [N1114] <sup>+</sup>              | -101.81       | -101.31 | -101.37 | -101.06     | -100.97 | -101.17 |

**Table S2** Electronic charges (a.u.) of the six adsorption systems including the [NO<sub>3</sub>] anion<sup>a</sup>

| Systems                    | [BHP][NO <sub>3</sub> ] | [BMP][NO <sub>3</sub> ] | [BHIM][NO <sub>3</sub> ] | [BMIM][NO <sub>3</sub> ] | [BuNH <sub>3</sub> ][NO <sub>3</sub> ] | [N1114][NO <sub>3</sub> ] |
|----------------------------|-------------------------|-------------------------|--------------------------|--------------------------|----------------------------------------|---------------------------|
| $q_{\text{CT}}$            | 0.02                    | -0.07                   | 0.03                     | -0.11                    | 0.03                                   | -0.07                     |
| $q_{\text{anion}}$         | -0.19                   | -0.18                   | -0.22                    | -0.21                    | -0.20                                  | -0.18                     |
| $q_{\text{cation}}$        | 0.21                    | 0.12                    | 0.24                     | 0.10                     | 0.23                                   | 0.10                      |
| $\Delta q_{\text{anion}}$  | 0.00                    | -0.11                   | 0.00                     | -0.12                    | 0.04                                   | -0.09                     |
| $\Delta q_{\text{cation}}$ | 0.02                    | 0.04                    | 0.03                     | 0.01                     | -0.01                                  | 0.02                      |

<sup>a</sup> $q_{\text{CT}}$  represents the amount of charge transfer between the graphite surface and the adsorbed ILs;  $q_{\text{anion}}$  and  $q_{\text{cation}}$  are the charges of anion and cation on the surface;  $\Delta q_{\text{anion}}$  and  $\Delta q_{\text{cation}}$  are the charge changes of anion and cation upon the adsorption of ILs on graphite.
